# Supplementary material for: Identification and quantitation of the actual active components in bamboo juice and its oral liquid by NMR and UPLC-Q-TOF-MS
Source: PubMed Central journal article supplement (PMC7661497; doi:10.1038/s41598-020-76897-3), 2020-11-12
Supplement: 41598_2020_76897_MOESM1_ESM.pdf [file 41598_2020_76897_MOESM1_ESM.pdf]

**Identification and quantitation of the actual active  
components in bamboo juice and its oral liquid by NMR and  
UPLC-Q-TOF-MS**

**Quan Gao<sup>1,‡</sup>, Detao Wang<sup>2,‡</sup>, Siyue Shao<sup>2</sup>, Yingying Xue<sup>2</sup>, Yingfang Zhang<sup>2</sup>,  
Chen Chen<sup>2</sup>, Feng Tang<sup>2</sup>, Jia Sun<sup>2,‡,\*</sup>, Yansu Li<sup>3,\*</sup>, Qirong Guo<sup>4</sup>**

**1** School of Plant Protection, Anhui Agricultural University, Hefei 230036, China

**2** State Forestry Administration Key Open Laboratory, International Centre for  
Bamboo and Rattan, Beijing 100102, China

**3** Institute of Vegetables and Flowers, the Chinese Academy of Agricultural Sciences,  
Beijing 100081, China

**4** College of Forestry, Nanjing Forestry University, Nanjing 210037, China

\* Corresponding Authors.

sunjia@icbr.ac.cn (J, Sun) and liyansu@caas.cn (YS, Li).

Tel.: +86 010-84789912; Fax: +86 010-84789821.

## **Supplementary information**

NMR and MS data for compounds **1-26**.

**Table S1.** Limits of detection, accuracy, and precision of compounds **1-26**.

**Table S2.** Accuracy test results of compounds **1-26**.

**Table S3.** Results of liner relationship of compounds **1-26**.

**Table S4.** Results of liner relationship of additive contents.

**Table S5.** Results of liner relationship of carbohydrate.

**Fig. S1.** Compounds **1-26** purification verification chromatography.

**Fig. S2.** HPLC chromatogram of three preservatives.

**Fig. S3.** Ion chromatography of carbohydrate.

## NMR and MS data for compounds 1-26

### Compound 1

ESI-MS  $m/z$ : 155.0703  $[M+H]^+$ ,  $C_8H_{10}O_3$ ;  $^1H$  NMR (500 MHz, DMSO)  $\delta$  6.87 (s, 1H, H-5), 6.69 (s, 2H, H-2,6), 4.36 (s, 2H, H-7), 3.75 (3-OCH<sub>3</sub>);  $^{13}C$  NMR (125 MHz, DMSO)  $\delta$  147.7 (C-3), 145.7 (C-4), 133.9 (C-1), 119.5 (C-6), 115.4 (C-5), 111.5 (C-2), 63.4 (C-7), 55.9 (4-OCH<sub>3</sub>).

### Compound 2

ESI-MS  $m/z$ : 197.0802  $[M+H]^+$ ,  $C_{10}H_{12}O_4$ ;  $^1H$  NMR (500 MHz, DMSO)  $\delta$  7.51 (d,  $J = 8.0$  Hz, 1H, H-2), 7.44 (s, 1H, H-6), 6.86 (d,  $J = 8.0$  Hz, 1H, H-3), 3.82 (s, 3H, 5-OCH<sub>3</sub>), 3.75 (t,  $J = 6.0$  Hz, 2H, H-3'), 3.05 (t,  $J = 6.0$  Hz, 2H, H-2');  $^{13}C$  NMR (125 MHz, DMSO)  $\delta$  197.67 (C-1'), 152.2 (C-4), 147.9 (C-5), 129.3 (C-1), 123.5 (C-2), 115.4 (C-3), 111.6 (C-6), 57.7 (C-3'), 56.1 (5-OCH<sub>3</sub>), 41.4 (C-2').

### Compound 3

ESI-MS  $m/z$ : 237.0719  $[M+Na]^+$ ,  $C_{10}H_{14}O_5$ ;  $^1H$  NMR (500 MHz, DMSO)  $\delta$  6.89 (s, 1H, H-2), 6.70 (s, 2H, H-5,6), 4.89 (s, 1H, H-7), 4.43 (d,  $J = 11.0$  Hz, 1H, H-8), 3.74 (s, 3H, 3-OCH<sub>3</sub>), 3.44 (s, 1H, H-9), 3.33 (d,  $J = 11.0$  Hz, 1H, H-9);  $^{13}C$  NMR (125 MHz, DMSO)  $\delta$  147.5 (C-3), 145.8 (C-4), 134.8 (C-1), 119.6 (C-6), 115.2 (C-5), 111.5 (C-2), 76.4 (C-7), 73.4 (C-8), 63.1 (C-9), 56.1 (3-OCH<sub>3</sub>).

### Compound 4

ESI-MS  $m/z$ : 211.0960  $[M+H]^+$ ,  $C_{11}H_{14}O_4$ ;  $^1H$  NMR (500 MHz, DMSO)  $\delta$  9.75 (s, 1H, CHO), 7.19 (s, 2H, H-2, 6), 3.84 (s, 6H, 3, 5-OCH<sub>3</sub>);  $^{13}C$  NMR (125 MHz, DMSO)  $\delta$  191.4 (CHO), 148.7 (C-3, 5), 143.3 (C-4), 127.2 (C-1), 107.6 (C-2, 6), 56.5 (OCH<sub>3</sub>).

### Compound 5

ESI-MS  $m/z$ : 199.0596  $[M+H]^+$ ,  $C_9H_{10}O_5$ ;  $^1H$  NMR (500 MHz, DMSO)  $\delta$  7.20 (s, 2H, H-3,5), 3.79 (2,6-OCH<sub>3</sub>);  $^{13}C$  NMR (125 MHz, DMSO)  $\delta$  166.6 (COOH), 148.1 (C-2,6), 143.6 (1-OH), 127.8 (C-4), 107.3 (C-3,5), 56.5 (2×OCH<sub>3</sub>).

### Compound 6

ESI-MS  $m/z$ : 183.0648  $[M+H]^+$ ,  $C_9H_{10}O_4$ ;  $^1H$  NMR (500 MHz, DMSO)  $\delta$  9.75 (s, 1H, CHO), 7.19 (s, 2H, H-2,6), 3.84 (s, 6H, 3,5-OCH<sub>3</sub>);  $^{13}C$  NMR (125 MHz, DMSO)  $\delta$  191.4 (CHO), 148.7 (C-3,5), 143.3 (C-4), 127.2 (C-1), 107.6 (C-2,6).

### Compound 7

ESI-MS  $m/z$ : 165.0535  $[M+H]^+$ ,  $C_9H_8O_3$ ;  $^1H$  NMR (500 MHz, DMSO)  $\delta$  11.01 (s, 1H, COOH), 7.50 (d,  $J = 7.0$  Hz, 2H, H-2, 6), 7.45 (s, 1H, H-7), 6.75 (t,  $J = 18.5$  Hz, 2H, H-3, 5), 6.29 (d,  $J = 15.5$  Hz, 1H, H-

8);  $^{13}\text{C}$  NMR (125 MHz, DMSO)  $\delta$  168.6 (C-COOH), 159.9 (C-4), 144.3 (C-7), 130.4 (C-2, 6), 125.8 (C-1), 116.2 (C-3, 5).

### Compound 8

ESI-MS  $m/z$ : 335.1094  $[\text{M}+\text{Na}]^+$ ,  $\text{C}_{15}\text{H}_{20}\text{O}_7$ ;  $^1\text{H}$  NMR (500 MHz, DMSO)  $\delta$  7.07 (d, 2H, H-2, 6), 6.75 (s, 1H, H-7), 6.43 (d,  $J = 9.5$  Hz, 2H, H-3,5), 5.64 (s, 1H, H-8), 4.33 (s, 1H, H-1'), 4.19 (s, 1H, H-9), 4.04 (s, 1H, H-9), 3.51 (s, 1H, H-6'), 3.34 (m, 4H, H-2, 3, 4,5);  $^{13}\text{C}$  NMR (125 MHz, DMSO)  $\delta$  157.2 (C-4), 130.8 (C-1), 130.5 (C-7), 127.6 (C-2, 6), 126.6 (C-8), 115.6 (C-3, 5), 102.8 (C-1'), 77.3 (C-5'), 77.2 (C-3'), 73.8 (C-2'), 70.5 (C-4'), 65.9 (C-9), 61.5 (C-6').

### Compound 9

ESI-MS  $m/z$ : 179.0698  $[\text{M}+\text{H}]^+$ ,  $\text{C}_{10}\text{H}_{10}\text{O}_3$ ;  $^1\text{H}$  NMR (500 MHz, DMSO)  $\delta$  9.57 (d,  $J = 7.5$  Hz, 1H, H-CHO), 7.58 (d,  $J = 15.5$  Hz, 1H, H-7), 7.32 (s, 1H, H-6), 7.16 (d,  $J = 7.5$  Hz, 1H, H-8), 6.81 (d,  $J = 8.0$  Hz, 1H, H-3), 6.71 (dd,  $J = 15.5, 8.0$  Hz, 1H, H-2), 3.82 (s, 3H, OCH<sub>3</sub>);  $^{13}\text{C}$  NMR (125 MHz, DMSO)  $\delta$  194.3 (CHO), 154.6 (C-5), 148.7 (C-4), 128.6 (C-8), 127.1 (C-7), 125.7 (C-1), 124.7 (C-2), 116.3 (C-3), 111.9 (C-6), 56.2 (OCH<sub>3</sub>).

### Compound 10

ESI-MS  $m/z$ : 181.0847  $[\text{M}+\text{H}]^+$ ,  $\text{C}_{10}\text{H}_{12}\text{O}_3$ ;  $^1\text{H}$  NMR (500 MHz, DMSO)  $\delta$  6.99 (s, 1H, H-6), 6.79 (d,  $J = 7.5$  Hz, 1H, H-2), 6.70 (d,  $J = 7.5$  Hz, 1H, H-5), 6.41 (d,  $J = 15.5$  Hz, 1H, H-7), 6.24 – 6.09 (m, 1H, H-8), 4.07 (s, 2H, H-9), 3.78 (s, 3H, H-OCH<sub>3</sub>);  $^{13}\text{C}$  NMR (125 MHz, DMSO)  $\delta$  148.2 (C-3), 146.7 (C-4), 129.4 (C-1), 128.9 (C-7), 127.9 (C-8), 119.9 (C-6), 115.9 (C-5), 110.3 (C-2), 62.2 (C-9), 56.1 (3-OCH<sub>3</sub>).

### Compound 11

ESI-MS  $m/z$ : 273.2039  $[\text{M}+\text{H}]^+$ ,  $\text{C}_{12}\text{H}_{16}\text{O}_7$ ;  $^1\text{H}$  NMR (500 MHz, DMSO)  $\delta$  6.86 (d,  $J = 8.5$  Hz, 2H, H-3, 5), 6.65 (d,  $J = 8.5$  Hz, 2H, H-2, 6);  $^{13}\text{C}$  NMR (125 MHz, DMSO)  $\delta$  152.7 (C-4), 150.8 (C-1), 118.2 (C-3, 5), 115.9 (C-2, 4), 102.3 (C-1'), 77.4 (C-5'), 77.1 (C-3'), 73.8 (C-2'), 70.3 (C-4'), 61.3 (C-6').

### Compound 12

ESI-MS  $m/z$ : 325.0890  $[\text{M}+\text{Na}]^+$ ,  $\text{C}_{13}\text{H}_{18}\text{O}_8$ ;  $^1\text{H}$  NMR (500 MHz, DMSO)  $\delta$  6.68 (s, 1H, H-5), 6.65 (d,  $J = 8.5$  Hz, 1H, H-6), 6.45 (d,  $J = 8.0$  Hz, 1H, H-3), 5.22 (d,  $J = 3.0$  Hz, 1H);  $^{13}\text{C}$  NMR (125 MHz, DMSO)  $\delta$  151.2 (C-4), 148.3 (C-2), 141.8 (C-1), 115.6 (C-6), 108.5 (C-5), 103.1 (C-3), 102.2 (C-1'), 77.5 (C-5'), 77.2 (C-3'), 73.8 (C-2'), 70.4 (C-4'), 61.3 (C-6').

### Compound 13

ESI-MS  $m/z$ : 355.0976  $[M+Na]^+$ ,  $C_{14}H_{20}O_9$ ;  $^1H$  NMR (500 MHz, DMSO)  $\delta$  7.84 (s, 1H, H-4), 6.38 (s, 2H, H-2,6), 5.22 (d,  $J$  = 3.5 Hz, 1H), 5.06 (s, 1H), 5.00 (d,  $J$  = 4.0 Hz, 1H), 4.68 (d,  $J$  = 7.0 Hz, 1H), 4.61 (s, 1H), 3.71 (2 $\times$ OCH<sub>3</sub>), 3.52 – 3.37 (m, 1H), 3.27 (dd,  $J$  = 19.5, 11.8 Hz, 4H), 3.11 (s, 1H);  $^{13}C$  NMR (125 MHz, DMSO)  $\delta$  150.7 (C-3,5), 148.6 (C-1), 130.9 (C-4), 102.1 (C-1'), 95.6 (C-2,6), 77.6 (C-5'), 77.3 (C-3'), 73.8 (C-2'), 70.6 (C-4'), 61.4 (C-6').

### Compound 14

ESI-MS  $m/z$ : 351.1048  $[M+Na]^+$ ,  $C_{15}H_{20}O_8$ ;  $^1H$  NMR (500 MHz, DMSO)  $\delta$  7.84 (d,  $J$  = 7.5 Hz, 2H, H-2, 6), 6.82 (d,  $J$  = 7.5 Hz, 2H, H-3, 5), 4.18 (s, 1H, H-9), 4.08 (s, 1H, H-9), 3.20 (s, 1H, H-8), 3.08 (s, 1H, H-8);  $^{13}C$  NMR (125 MHz, DMSO)  $\delta$  196.7 (C-7), 163.3 (C-4), 131.1 (C-2, 6), 128.5 (C-1), 115.8 (C-3, 5), 103.6 (C-1'), 77.4 (C-5'), 77.3 (C-3'), 73.9 (C-2'), 70.6 (C-4'), 65.1 (C-9), 61.6 (C-6'), 40.8 (C-8).

### Compound 15

ESI-MS  $m/z$ : 381.1186  $[M+Na]^+$ ,  $C_{16}H_{22}O_9$ ;  $^1H$  NMR (500 MHz, DMSO)  $\delta$  7.50 (d,  $J$  = 6.5 Hz, 1H, H-6), 7.41 (s, 1H, H-2), 6.99 (d, 1H, H-5), 3.80 (s, 3H, 3-OCH<sub>3</sub>);  $^{13}C$  NMR (125 MHz, DMSO)  $\delta$  196.4 (C-7), 148.4 (C-4), 148.2 (C-3), 147.9 (C-1), 123.9 (C-6), 115.6 (C-5), 111.4 (C-2), 103.6 (C-1'), 77.3 (C-5'), 77.2 (C-3'), 73.9 (C-2'), 70.6 (C-4'), 65.3 (C-6'), 61.5 (C-9), 55.9 (C-8).

### Compound 16

ESI-MS  $m/z$ : 357.1329  $[M+H]^+$ ,  $C_{20}H_{20}O_6$ ;  $^1H$  NMR (500 MHz, DMSO)  $\delta$  9.61 (CHO), 7.65 (d,  $J$  = 16 Hz, 1H, H-7'), 7.31 (s, 1H, H-2'), 6.93 (s, 1H, H-5), 6.79 (d,  $J$  = 12.5 Hz, 1H, H-8'), 5.56 (d,  $J$  = 6.5 Hz, 1H, H-7), 5.06 (s, 1H), 4.08 (s, 1H), 3.84 (s, 3H, OCH<sub>3</sub>), 3.75 (s, 3H, OCH<sub>3</sub>);  $^{13}C$  NMR (125 MHz, DMSO)  $\delta$  194.64 (CHO), 154.7 (C-7'), 151.2 (C-4'), 148.1 (C-3), 147.1 (C-4), 144.6 (C-3'), 132.2 (C-1), 130.7 (C-1'), 128.2 (C-5'), 126.6 (C-8'), 119.5 (C-6), 119.2 (C-6'), 115.9 (C-5), 112.9 (C-2'), 110.9 (C-2), 88.7 (C-7), 63.2 (C-9), 56.4 (C-8), 56.1 (OCH<sub>3</sub>), 52.9 (OCH<sub>3</sub>).

### Compound 17

ESI-MS  $m/z$ : 387.1432  $[M+H]^+$ ,  $C_{21}H_{22}O_7$ ;  $^1H$  NMR (500 MHz, DMSO)  $\delta$  9.60 (CHO), 7.66 (d,  $J$  = 16 Hz, 1H, H-7'), 7.33 (s, 2H), 6.79 (dd,  $J$  = 16, 8.0 Hz, 2H), 6.64 (s, 2H), 6.61 (s, 1H), 5.55 (d,  $J$  = 7.0 Hz, 1H), 3.85 (s, 3H), 3.76 (s, 2H), 3.73 (s, 6H), 3.56 (d,  $J$  = 6.5 Hz, 1H), 3.17 (s, 3H);  $^{13}C$  NMR (125 MHz, DMSO)  $\delta$  194.5 (CHO), 154.4 (C-7'), 151.2 (C-4'), 148.5 (C-3, 5), 144.6 (C-4), 130.8 (C-3'), 128.2 (C-1), 126.6 (C-1'), 119.4 (C-5'), 113.1 (C-8'), 104.4 (C-2, 6), 88.9 (C-6'), 62.9 (C-7), 56.5 (C-9), 56.4 (C-8), 52.8 (2 $\times$ OCH<sub>3</sub>), 49.1 (OCH<sub>3</sub>).

### Compound 18

ESI-MS  $m/z$ : 169.0479  $[M+H]^+$ ,  $C_8H_8O_4$ ;  $^1H$  NMR (500 MHz, DMSO)  $\delta$  5.97 (s, 2H, H-3, 5), 3.75 (s, 6H, OCH<sub>3</sub>);  $^{13}C$  NMR (125 MHz, DMSO)  $\delta$  187.5 (C-4), 176.5 (C-1), 157.7 (C-2, 6), 107.5 (C-3, 5), 56.9 (OCH<sub>3</sub>).

### Compound 19

ESI-MS  $m/z$ : 127.0388  $[M+H]^+$ ,  $C_6H_6O_3$ ;  $^1H$  NMR (500 MHz, DMSO)  $\delta$  7.48 (d,  $J = 2.5$  Hz, 1H, H-4), 6.60 (d,  $J = 2.5$  Hz, 1H, H-4), 4.51 (s, 2H, H-2);  $^{13}C$  NMR (125 MHz, DMSO)  $\delta$  178.40 (CHO), 162.6 (C-2), 152.2 (C-5), 124.8 (C-4), 110.1 (C-3), 56.4 (C-2).

### Compound 20

ESI-MS  $m/z$ : 268.1039  $[M+H]^+$ ,  $C_{10}H_{13}N_3O_4$ ;  $^1H$  NMR (500 MHz, DMSO)  $\delta$  8.34 (s, 1H, H-2), 8.13 (s, 1H, H-8), 7.32 (s, 2H, H-6), 5.97 (s, 1H, H-1'), 5.88 (d,  $J = 5.5$  Hz, 1H, H-2'), 5.42 (d, 1H, H-3'), 5.17 (d,  $J = 2.5$  Hz, 1H, H-4');  $^{13}C$  NMR (125 MHz, DMSO)  $\delta$  156.60 (C-6), 152.8 (C-2), 149.5 (C-4), 140.3 (C-8), 119.8 (C-5), 88.3 (C-1'), 86.3 (C-4'), 73.9 (C-2'), 71.1 (C-3'), 62.1 (C-5').

### Compound 21

ESI-MS  $m/z$ : 325.0890  $[M+Na]^+$ ,  $C_{13}H_{18}O_8$ ;  $^1H$  NMR (500 MHz, DMSO)  $\delta$  6.89 (d,  $J = 8.5$  Hz, 1H, H-3), 6.40 (s, 1H, H-6), 6.23 (d,  $J = 8.0$  Hz, 1H, H-4), 4.67 (d,  $J = 6.0$  Hz, 1H, H-1'), 4.47 (s, 1H), 3.64 (s, 1H), 3.20 (s, 4H);  $^{13}C$  NMR (125 MHz, DMSO)  $\delta$  153.2 (C-5), 150.4 (C-1), 139.9 (C-2), 117.9 (C-3), 106.5 (C-4), 102.1 (C-1''), 77.4 (C-5''), 77.3 (C-3''), 73.8 (C-2''), 70.3 (C-4''), 61.3 (C-6'').

### Compound 22

ESI-MS  $m/z$ : 605.2199  $[M+Na]^+$ ,  $C_{28}H_{38}O_{13}$ ;  $^1H$  NMR (500 MHz, DMSO)  $\delta$  6.43 (s, 1H, H-6), 6.23 (s, 2H, H-2', 6'), 4.06 (d, 1H, H-7'), 3.64 (s, 3H, OCH<sub>3</sub>), 3.53 (s, 6H, 2×OCH<sub>3</sub>), 3.39 (m, 1H, H-9), 3.17 (s, 3H, OCH<sub>3</sub>), 3.04 (d, 1H, H-9), 2.96 (d, 2H, H-9'), 2.52 (d,  $J = 12.0$  Hz, 1H, H-7), 2.40 (d,  $J = 12.0$  Hz, 1H, H-7), 1.86 (s, 1H, H-8'), 1.39 (s, 1H, H-8);  $^{13}C$  NMR (125 MHz, DMSO)  $\delta$  148.6 (C-3', 5'), 148.1 (C-3), 147.6 (C-5), 138.6 (C-4), 138.4 (C-1'), 134.5 (C-4'), 129.6 (C-1), 126.1 (C-2), 107.9 (C-6), 107.1 (C-2', 6'), 104.5 (C-1''), 78.1 (C-5''), 78.0 (C-3''), 74.7 (C-2''), 71.3 (C-4''), 70.8 (C-6''), 65.2 (C-9), 62.3 (C-9'), 60.0 (3-OCH<sub>3</sub>), 57.2 (C-3', 5'-OCH<sub>3</sub>), 56.8 (5-OCH<sub>3</sub>), 45.5 (C-8'), 41.7 (C-7'), 41.4 (C-8), 33.5 (C-7).

### Compound 23

ESI-MS  $m/z$ : 575.209  $[M+Na]^+$ ,  $C_{27}H_{36}O_{12}$ ;  $^1H$  NMR (500 MHz, DMSO)  $\delta$  6.60 (s, 1H, H-2), 6.43 (s, 2H, H-2', 6'), 6.09 (s, 1H, H-5), 4.07 (d,  $J = 10.9$  Hz, 1H, H-7'), 3.93 (d,  $J = 8.0$  Hz, 1H, H-1''), 3.92 (d,

1H, H-9'), 3.59 (d, 1H, H-9), 3.47 (d, 1H, H-9), 3.14 – 2.95 (m, 4H), 2.92 (d,  $J = 8.0$  Hz, 1H, H-9'), 2.73 (d,  $J = 7.5$  Hz, 2H, H-7), 1.92 (s, 1H, H-8'), 1.72 (s, 1H, H-8);  $^{13}\text{C}$  NMR (125 MHz, DMSO)  $\delta$  148.3 (C-3', 5'), 146.1 (C-3), 144.5 (C-4), 136.3 (C-1'), 134.1 (C-4'), 133.1 (C-6), 127.5 (C-1), 116.6 (C-5), 112.3 (C-2), 107.1 (C-6'), 104.8 (C-1''), 77.4 (C-5''), 77.3 (C-3''), 74.1 (C-2''), 70.5 (C-4''), 68.1 (C-9'), 63.2 (C-9), 61.5 (C-6''), 56.5 (C-3', 5'-OCH<sub>3</sub>), 55.9 (C-3), 46.7 (C-7'), 46.6 (C-8'), 44.4 (C-8), 32.6 (C-7).

#### Compound 24

ESI-MS  $m/z$ : 605.2194 [M+Na]<sup>+</sup>, C<sub>28</sub>H<sub>38</sub>O<sub>13</sub>;  $^1\text{H}$  NMR (500 MHz, DMSO)  $\delta$  6.55 (s, 1H, H-6), 6.28 (s, 2H, H-2', 6'), 4.19 (d,  $J = 5.0$  Hz, H-7'), 4.07 (d,  $J = 7.5$  Hz, H-9'), 3.76 (s, 3H, OCH<sub>3</sub>), 3.63 (s, 6H, 2×OCH<sub>3</sub>), 3.27 (s, 3H, OCH<sub>3</sub>), 3.14 – 2.95 (m, 5H), 2.01 (s, 1H, H-8'), 1.47 (s, 1H, H-8);  $^{13}\text{C}$  NMR (125 MHz, DMSO)  $\delta$  148.1 (C-3', 5'), 147.4 (C-3), 146.9 (C-5), 138.1 (C-4), 137.7 (C-1'), 133.9 (C-4'), 129.1 (C-1), 125.3 (C-2), 107.1 (C-6), 106.4 (C-2', 6'), 103.6 (C-1''), 77.5 (C-5''), 77.3 (C-3''), 74.1 (C-2''), 70.5 (C-4''), 64.6 (C-9), 61.6 (C-9'), 59.5 (3-OCH<sub>3</sub>), 56.6 (C-3', 5'-OCH<sub>3</sub>), 56.2 (5-OCH<sub>3</sub>) 44.8 (C-8'), 41.23 (C-7'), 40.9 (C-8), 32.8 (C-7).

#### Compound 25

ESI-MS  $m/z$ : 605.2189 [M+Na]<sup>+</sup>, C<sub>28</sub>H<sub>38</sub>O<sub>13</sub>;  $^1\text{H}$  NMR (500 MHz, DMSO)  $\delta$ : 6.59 (2H, s, H-2',6'), 6.44 (2H, s, H-2, 6), 4.87 (1H, d,  $J=7.0\text{Hz}$ , H-1''), 4.72 (1H, d,  $J=6.0\text{Hz}$ , H-7'), 3.90 (1H, dd,  $J=8.0\text{Hz}$ , H-9), 3.75 (1H, m, H-9'), 3.74 (6H, s, 3',5'-OCH<sub>3</sub>), 3.72 (6H, s, 3,5-OCH<sub>3</sub>), 3.60 (1H, dd,  $J=7.5, 8.0\text{Hz}$ , H-9), 3.58 (1H, m, H-6''), 3.51 (1H, m, H-9'), 3.40 (1H, m, H-6'), 3.18 (1H, m, H-3''), 3.11 (1H, m, H-2''), 3.09 (1H, m, H-5''), 3.03 (1H, m, H-4''), 2.83 (1H, dd,  $J=4.5, 13.5$  Hz, H-7), 2.60 (1H, m, H-8), 2.41 (1H, dd,  $J=11.5, 13.5\text{Hz}$ , H-7), 2.23 (1H, m, H-8');  $^{13}\text{C}$  NMR (125MHz, DMSO)  $\delta$ : 153 (C-3',5'), 148.4 (C-3,5), 140.1 (C-1'), 134 (C-4'), 133.8 (C-4), 131.4 (C-1), 106.3 (C-2,6), 104.3 (C-2',6'), 103.2 (C-1''), 82.3 (C-7'), 77.7 (C-5''), 77.0 (C-3''), 74.7 (C-2''), 72.5 (C-9), 70.4 (C-4''), 61.4 (C-6''), 59.2 (C-9'), 56.9 (C-3',5'-OCH<sub>3</sub>), 56.4 (3,5-OCH<sub>3</sub>), 52.9 (C-8'), 42.5 (C-8), 33.2 (C-7).

#### Compound 26

ESI-MS  $m/z$ : 603.2039 [M+Na]<sup>+</sup>, C<sub>28</sub>H<sub>36</sub>O<sub>13</sub>;  $^1\text{H}$  NMR (500 MHz, DMSO)  $\delta$  6.66 (s, 2H, H-2, 6), 6.60 (s, 2H, H-2', 6'), 4.66 (d,  $J = 4.5$  Hz, 1H, H-7'), 4.61 (d,  $J = 4.5$  Hz, 1H, H-7), 4.33 (s, 1H), 4.18 (dd,  $J = 7.0, 4.8$  Hz, 2H, H-9, 9'), 3.79 (dd,  $J = 7.0, 3.9$  Hz, 2H, H-9, 9'), 3.21 – 3.17 (m, 4H);  $^{13}\text{C}$  NMR (125 MHz, DMSO)  $\delta$  153.1 (C-3, 5), 148.4 (C-3', 6') 137.7 (C-4), 135.3 (C-4'), 134.1 (C-1'), 131.8 (C-1), 104.6 (C-2', 6'), 104.1 (C-2, 6), 103.1 (C-1''), 85.9 (C-7'), 85.6 (C-7), 77.75 (C-5''), 77.01 (C-3''), 74.65



(C-2''), 71.75 (C-4''), 71.7 (C-9'), 70.4 (C-9), 61.39 (C-6''), 56.9 (OCH<sub>3</sub>), 56.5 (OCH<sub>3</sub>), 54.2 (C-8'), 54.1 (C-8).

**Table S1.** Limits of detection, accuracy, and precision of compounds **1-26**

| Compound  | LOD<br>(mg/L)         | LOQ<br>(mg/L)         | Accuracy precision<br>(RSD%, n=6) | Intraday precision<br>(RSD%, n=6) | Interday precision<br>(RSD%, n=6) |
|-----------|-----------------------|-----------------------|-----------------------------------|-----------------------------------|-----------------------------------|
| <b>1</b>  | $2 \times 10^{-2}$    | $0.35 \times 10^{-1}$ | 0.92                              | 0.83                              | 1.44                              |
| <b>2</b>  | $4 \times 10^{-4}$    | $0.12 \times 10^{-2}$ | 1.22                              | 1.32                              | 2.42                              |
| <b>3</b>  | $1.4 \times 10^{-3}$  | $0.23 \times 10^{-2}$ | 0.63                              | 1.24                              | 0.94                              |
| <b>4</b>  | $1 \times 10^{-2}$    | 0.05                  | 1.28                              | 0.75                              | 1.75                              |
| <b>5</b>  | $2 \times 10^{-2}$    | 0.05                  | 0.81                              | 1.24                              | 2.52                              |
| <b>6</b>  | $4.8 \times 10^{-3}$  | $0.12 \times 10^{-1}$ | 0.51                              | 0.41                              | 1.64                              |
| <b>7</b>  | $5 \times 10^{-1}$    | 1.03                  | 0.95                              | 0.81                              | 1.47                              |
| <b>8</b>  | $7 \times 10^{-3}$    | $2.21 \times 10^{-2}$ | 1.46                              | 1.43                              | 1.52                              |
| <b>9</b>  | $1.1 \times 10^{-2}$  | $0.51 \times 10^{-1}$ | 2.35                              | 1.69                              | 1.81                              |
| <b>10</b> | $2.83 \times 10^{-1}$ | $3.25 \times 10^{-1}$ | 1.04                              | 1.41                              | 1.18                              |
| <b>11</b> | $0.58 \times 10^{-2}$ | $2.12 \times 10^{-2}$ | 1.03                              | 1.75                              | 1.21                              |
| <b>12</b> | $3 \times 10^{-2}$    | 0.06                  | 0.91                              | 1.02                              | 1.46                              |
| <b>13</b> | $0.36 \times 10^{-2}$ | 0.02                  | 1.01                              | 2.03                              | 1.56                              |
| <b>14</b> | $0.05 \times 10^{-2}$ | $0.01 \times 10^{-1}$ | 1.15                              | 0.81                              | 1.19                              |
| <b>15</b> | $0.12 \times 10^{-2}$ | $0.24 \times 10^{-2}$ | 0.56                              | 0.87                              | 2.13                              |
| <b>16</b> | $0.04 \times 10^{-2}$ | $0.08 \times 10^{-2}$ | 0.95                              | 0.87                              | 1.21                              |
| <b>17</b> | $0.13 \times 10^{-2}$ | $0.37 \times 10^{-2}$ | 1.13                              | 1.21                              | 1.77                              |
| <b>18</b> | $0.14 \times 10^{-2}$ | $0.23 \times 10^{-2}$ | 0.61                              | 1.71                              | 0.53                              |
| <b>19</b> | $0.68 \times 10^{-2}$ | $0.28 \times 10^{-1}$ | 1.49                              | 1.61                              | 1.71                              |
| <b>20</b> | $0.13 \times 10^{-2}$ | $0.22 \times 10^{-2}$ | 1.32                              | 1.42                              | 1.56                              |
| <b>21</b> | $0.02 \times 10^{-1}$ | 0.01                  | 0.51                              | 0.67                              | 0.83                              |
| <b>22</b> | $0.06 \times 10^{-1}$ | $0.12 \times 10^{-1}$ | 1.03                              | 1.35                              | 1.91                              |
| <b>23</b> | $0.08 \times 10^{-1}$ | $0.32 \times 10^{-2}$ | 1.39                              | 1.32                              | 1.87                              |
| <b>24</b> | $0.08 \times 10^{-1}$ | $0.28 \times 10^{-1}$ | 1.21                              | 1.98                              | 2.17                              |
| <b>25</b> | $0.52 \times 10^{-2}$ | $1.24 \times 10^{-2}$ | 1.46                              | 1.72                              | 0.98                              |
| <b>26</b> | $0.09 \times 10^{-2}$ | $0.15 \times 10^{-2}$ | 1.42                              | 1.54                              | 2.02                              |

**Table S2.** Accuracy test results of compounds **1-26**

| No. | Recovery (%) | RSD (%) | Recovery (%) | RSD (%) | Recovery (%) | RSD (%) |
|-----|--------------|---------|--------------|---------|--------------|---------|
| 1   | 103.37       | 1.29    | 102.89       | 2.23    | 95.11        | 1.97    |
| 2   | 104.33       | 1.25    | 115.28       | 0.88    | 118.71       | 3.76    |
| 3   | 87.6         | 0.52    | 88.96        | 1.77    | 88.75        | 1.99    |
| 4   | 92.67        | 2.17    | 89.21        | 1.84    | 88.35        | 1.77    |
| 5   | 92.13        | 1.96    | 97.3         | 2.83    | 97.33        | 2.99    |
| 6   | 89.45        | 0.59    | 92.33        | 0.85    | 89.46        | 0.61    |
| 7   | 94.64        | 1.41    | 90.37        | 0.9     | 90.32        | 2.92    |
| 8   | 93.59        | 0.89    | 91.39        | 2.66    | 87.42        | 2.07    |
| 9   | 90.45        | 2.64    | 96.95        | 2.37    | 92.24        | 0.57    |
| 10  | 94.07        | 1.41    | 90.71        | 1.55    | 90.04        | 2.28    |
| 11  | 107.24       | 1.72    | 111.75       | 2.67    | 91.25        | 2.71    |
| 12  | 108.67       | 1.41    | 94.39        | 2.64    | 90.63        | 0.86    |
| 13  | 103.88       | 1.65    | 90.61        | 2.33    | 91.22        | 2.15    |
| 14  | 119.33       | 0.97    | 107.5        | 0.66    | 91.63        | 1.85    |
| 15  | 93.47        | 1.31    | 92.08        | 2.22    | 88.82        | 2.99    |
| 16  | 89.16        | 1.07    | 92.36        | 1.27    | 88.68        | 0.24    |
| 17  | 99.55        | 1.14    | 96.86        | 2.05    | 92.21        | 1.29    |
| 18  | 90.64        | 2.11    | 91.41        | 1.98    | 91.11        | 2.42    |
| 19  | 88.87        | 1.71    | 90.72        | 0.81    | 91.79        | 2.23    |
| 20  | 104.54       | 1.41    | 98.98        | 2.25    | 97.39        | 2.23    |
| 21  | 98.23        | 0.75    | 93.24        | 1.34    | 90.22        | 0.87    |
| 22  | 106.81       | 0.97    | 114.23       | 4.52    | 99.78        | 2.18    |
| 23  | 90.08        | 1.55    | 92.18        | 0.44    | 88.19        | 1.76    |
| 24  | 105.01       | 0.54    | 95.56        | 1.99    | 95.24        | 2.65    |
| 25  | 98.23        | 1.73    | 95.86        | 2.54    | 96.9         | 2.52    |
| 26  | 110.86       | 1.24    | 114.69       | 2.61    | 112.61       | 2.69    |

**Table S3.** Results of liner relationship of compounds **1-26**

| No. | Molecular mass              | Linear equation                  | R <sup>2</sup>          | Linear range                | Content |
|-----|-----------------------------|----------------------------------|-------------------------|-----------------------------|---------|
| 1   | 155.0703[M+H] <sup>+</sup>  | y = 36499x + 28848               | R <sup>2</sup> = 0.9978 | 1.2×10 <sup>-1</sup> -10    | 2.31    |
| 2   | 197.0802[M+H] <sup>+</sup>  | y = 2×10 <sup>7</sup> x + 10824  | R <sup>2</sup> = 0.9991 | 2.3×10 <sup>-3</sup> -0.54  | 0.43    |
| 3   | 237.0719[M+Na] <sup>+</sup> | y = 4×10 <sup>6</sup> x - 1298.3 | R <sup>2</sup> = 0.9997 | 2.8×10 <sup>-3</sup> -0.28  | 0.15    |
| 4   | 211.0960[M+H] <sup>+</sup>  | y = 55489x + 65521               | R <sup>2</sup> = 0.9996 | 1.1×10 <sup>-1</sup> -27.5  | 2.13    |
| 5   | 199.0596[M+H] <sup>+</sup>  | y = 103029x + 13044              | R <sup>2</sup> = 0.9991 | 1.3×10 <sup>-1</sup> -12.5  | 4.11    |
| 6   | 183.0648[M+H] <sup>+</sup>  | y = 382839x + 2590.5             | R <sup>2</sup> = 0.9985 | 2.4×10 <sup>-2</sup> -6     | 1.43    |
| 7   | 165.0535[M+H] <sup>+</sup>  | y = 28205x + 79386               | R <sup>2</sup> = 0.9990 | 5-80                        | 7.34    |
| 8   | 335.1094[M+Na] <sup>+</sup> | y = 484453x + 9440.8             | R <sup>2</sup> = 0.9998 | 3.5×10 <sup>-2</sup> -3.5   | 1.68    |
| 9   | 179.0698[M+H] <sup>+</sup>  | y = 697754x + 78221              | R <sup>2</sup> = 0.9991 | 5.5×10 <sup>-2</sup> -5.5   | 7.21    |
| 10  | 181.0847[M+H] <sup>+</sup>  | y = 31273x + 2771.4              | R <sup>2</sup> = 0.9992 | 2.5-40                      | 5.03    |
| 11  | 295.0758[M+Na] <sup>+</sup> | y = 346037x + 7350.2             | R <sup>2</sup> = 0.9995 | 2.32×10 <sup>-2</sup> -1.16 | 15.21   |
| 12  | 325.0890[M+Na] <sup>+</sup> | y = 586432x + 220829             | R <sup>2</sup> = 0.9992 | 12×10 <sup>-2</sup> -15     | 35.37   |
| 13  | 355.0976[M+Na] <sup>+</sup> | y = 58216x + 5537.6              | R <sup>2</sup> = 0.9990 | 2.8×10 <sup>-2</sup> -3.5   | 20.58   |
| 14  | 351.1048[M+Na] <sup>+</sup> | y = 2×10 <sup>7</sup> x + 54590  | R <sup>2</sup> = 0.9991 | 2×10 <sup>-2</sup> -0.2     | 12.73   |
| 15  | 381.1186[M+Na] <sup>+</sup> | y = 4×10 <sup>6</sup> x - 26825  | R <sup>2</sup> = 0.9998 | 4.8×10 <sup>-3</sup> -0.6   | 7.34    |
| 16  | 357.1329[M+H] <sup>+</sup>  | y = 8×10 <sup>6</sup> x + 67039  | R <sup>2</sup> = 0.9982 | 3.2×10 <sup>-3</sup> -0.4   | 1.07    |
| 17  | 387.1432[M+H] <sup>+</sup>  | y = 5×10 <sup>6</sup> x + 13639  | R <sup>2</sup> = 0.9992 | 5.2×10 <sup>-3</sup> -0.26  | 1.72    |
| 18  | 169.0479[M+H] <sup>+</sup>  | y = 2×10 <sup>6</sup> x + 22611  | R <sup>2</sup> = 0.9996 | 7.2×10 <sup>-3</sup> -0.9   | 1.71    |
| 19  | 127.0388[M+H] <sup>+</sup>  | y = 516891x + 49813              | R <sup>2</sup> = 0.9990 | 3.4×10 <sup>-2</sup> -3.4   | 2.96    |
| 20  | 268.1039[M+H] <sup>+</sup>  | y = 1×10 <sup>8</sup> x + 154801 | R <sup>2</sup> = 0.9994 | 2.6×10 <sup>-3</sup> -0.13  | 0.62    |
| 21  | 355.0976[M+Na] <sup>+</sup> | y = 58216x + 5537.6              | R <sup>2</sup> = 0.9990 | 2.8×10 <sup>-2</sup> -3.5   | 16.58   |
| 22  | 605.2199[M+Na] <sup>+</sup> | y = 1×10 <sup>6</sup> x + 30.324 | R <sup>2</sup> = 0.9999 | 2.4×10 <sup>-2</sup> -3     | 47.13   |
| 23  | 575.2091[M+Na] <sup>+</sup> | y = 230030x + 6456.1             | R <sup>2</sup> = 0.9989 | 8×10 <sup>-2</sup> -8       | 17.74   |
| 24  | 605.2194[M+Na] <sup>+</sup> | y = 521054x - 15576              | R <sup>2</sup> = 0.9996 | 3.2×10 <sup>-2</sup> -4     | 14.50   |
| 25  | 605.2189[M+Na] <sup>+</sup> | y = 783548x - 5838.1             | R <sup>2</sup> = 0.9999 | 2.6×10 <sup>-2</sup> -1.3   | 3.71    |
| 26  | 603.2039[M+Na] <sup>+</sup> | y = 4×10 <sup>6</sup> x - 4614.9 | R <sup>2</sup> = 0.9992 | 1.8×10 <sup>-3</sup> -0.18  | 6.78    |

**Table S4.** Results of liner relationship of additive contents

| Additive     | $\lambda_{\max}$ (nm) | M/Z                        | Line equation       | R <sup>2</sup> | Linear range |
|--------------|-----------------------|----------------------------|---------------------|----------------|--------------|
| benzoic acid | 228                   | 145.026[M+Na] <sup>+</sup> | y = 60695x + 64306  | 0.9993         | 2.5-40       |
| ethylparaben | 255                   | 189.052[M+Na] <sup>+</sup> | y = 51804x + 5634.1 | 0.9999         | 0.625-10     |
| sorbic acid  | 259                   | 135.041[M+Na] <sup>+</sup> | y = 130523x - 2052  | 0.9996         | 1.25-20      |

**Table S5.** Results of liner relationship of carbohydrate

| Carbohydrate | Linear equation        | R <sup>2</sup> | Linear range |
|--------------|------------------------|----------------|--------------|
| arabinose    | $y = 64.25x + 32.686$  | 0.9991         | 4.34-63.40   |
| glucose      | $y = 62.806x - 89.899$ | 0.9994         | 2.26-132.60  |
| xylose       | $y = 72.615x - 55.297$ | 0.9991         | 2.40-74.10   |
| mannose      | $y = 50.744x - 8.7535$ | 0.9996         | 1.14-33.40   |

Compound 1

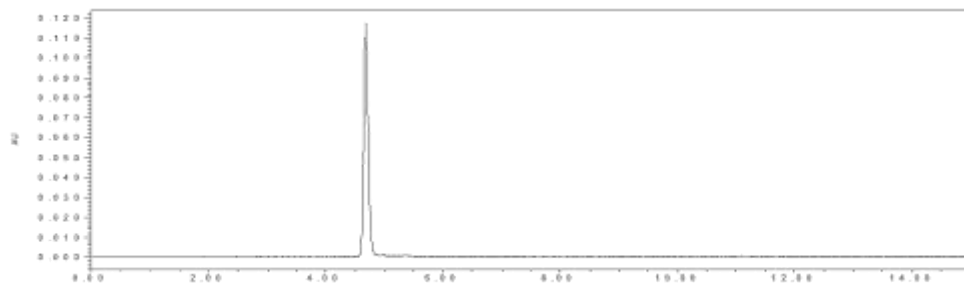

Compound 2

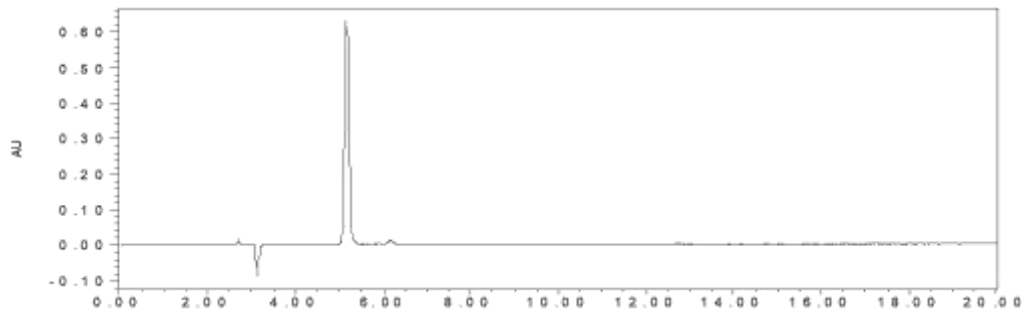

Compound 3

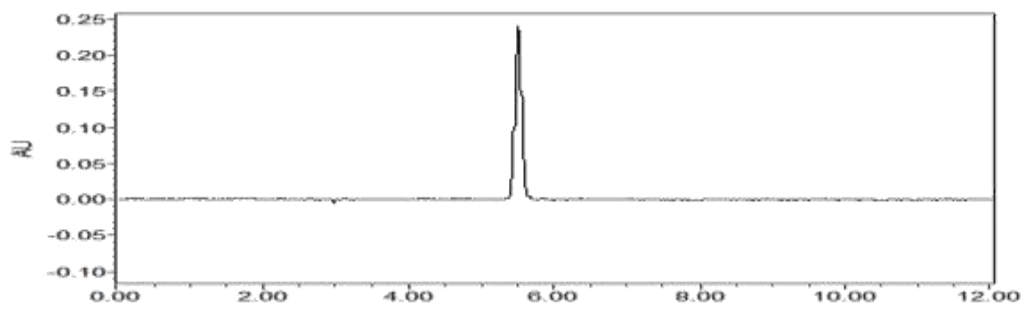

Compound 4

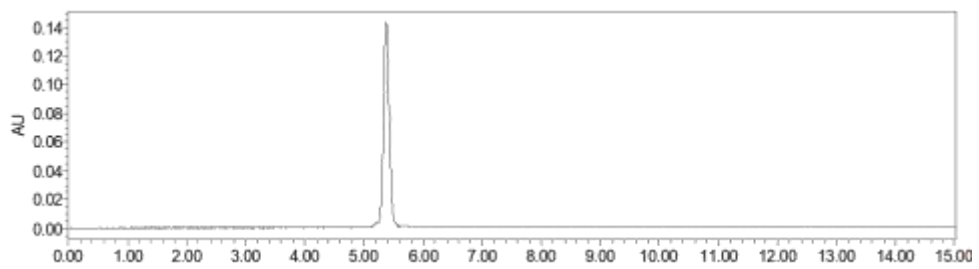

Compound 5

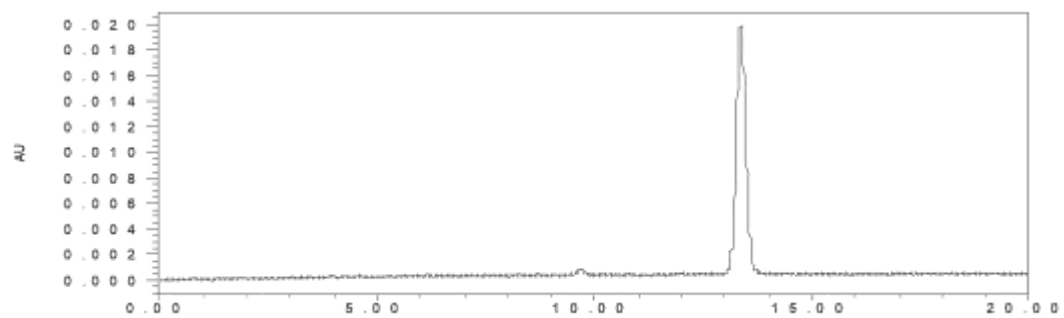

Compound 6

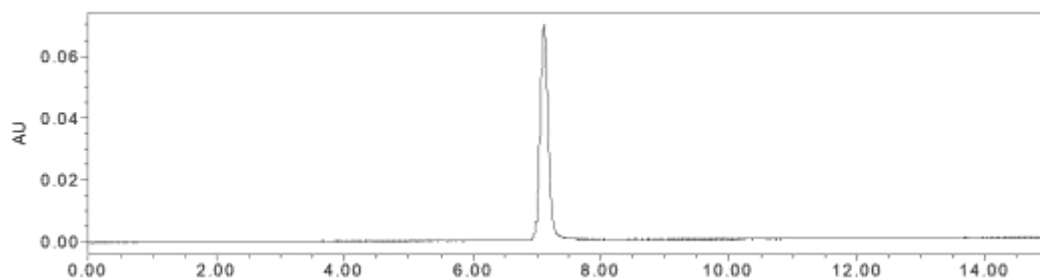

Compound 7

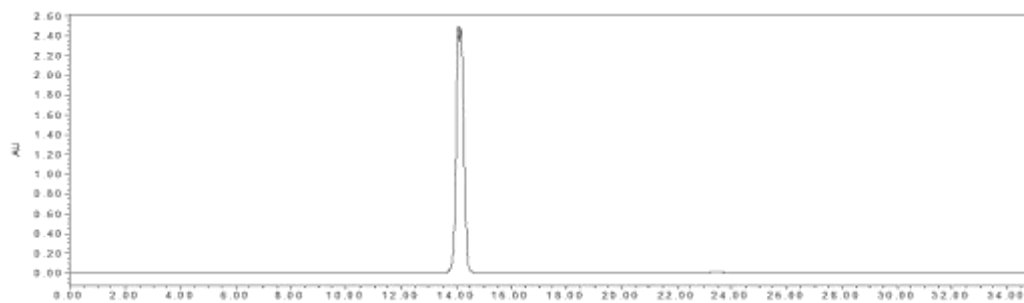

Compound 8

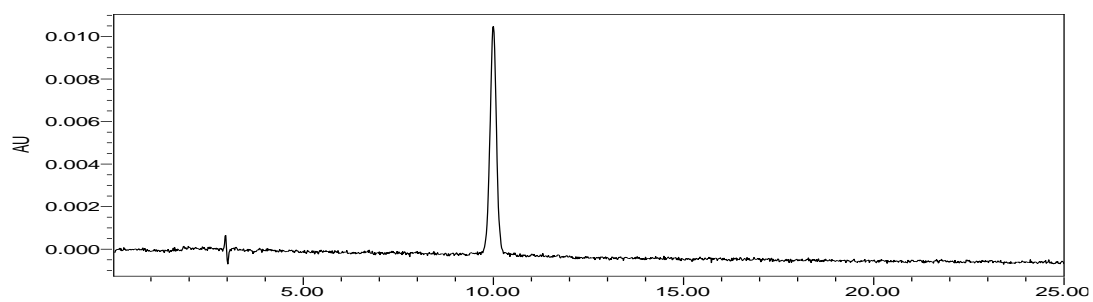

Compound 9

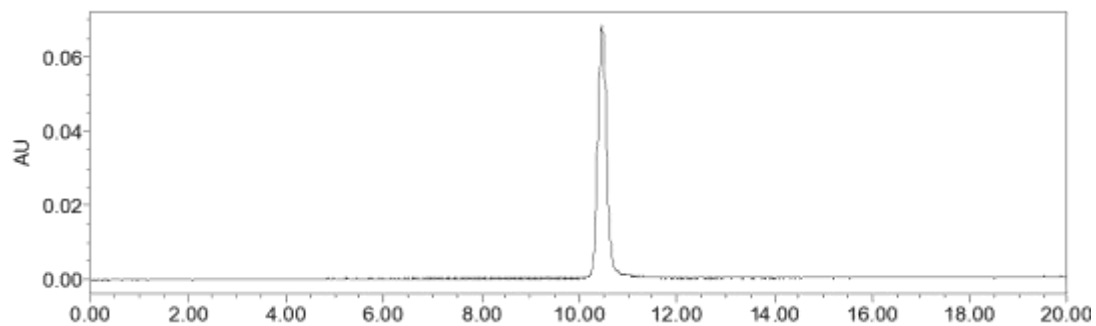

Compound 10

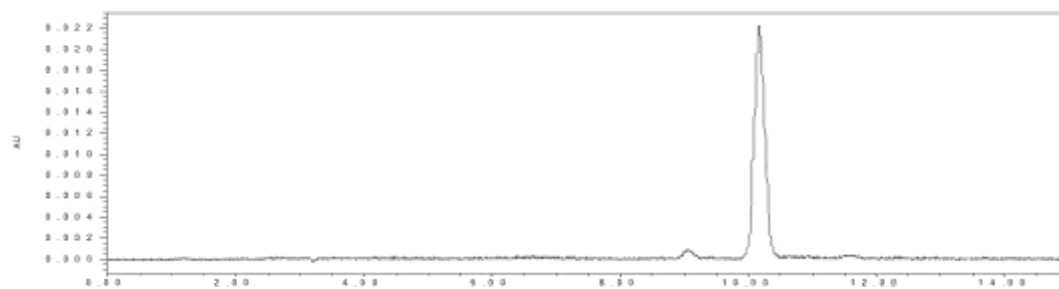



Compound 11

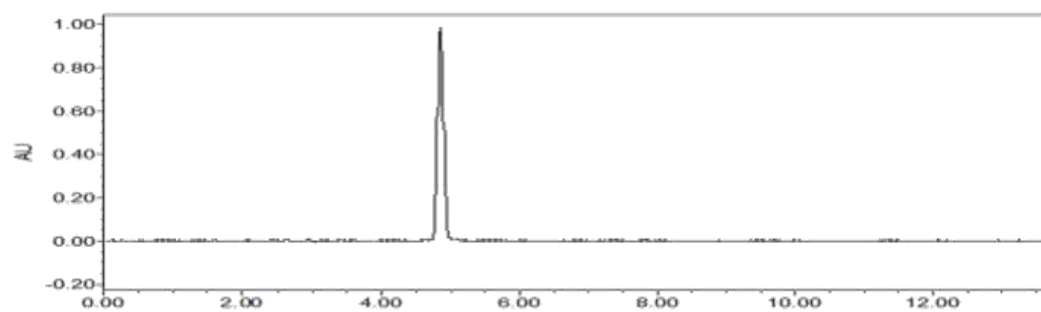

Compound 12

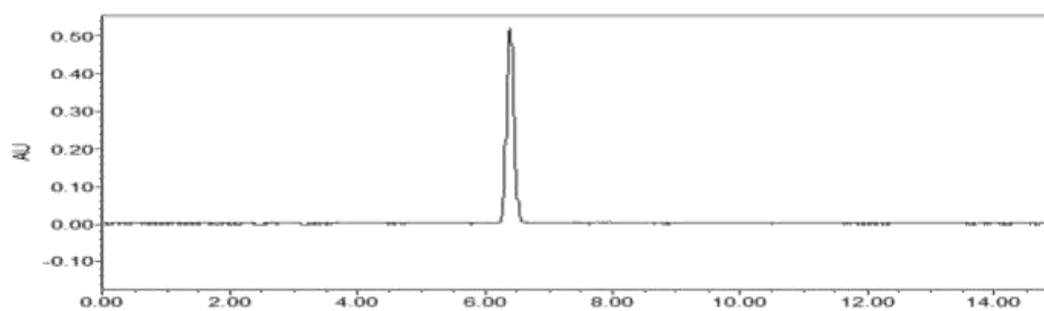

Compound 13

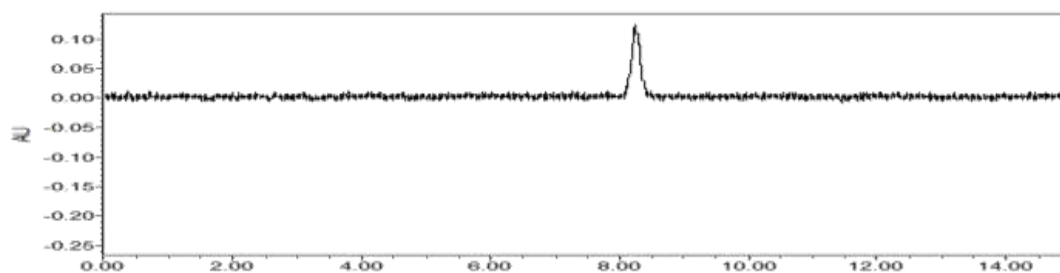

Compound 14

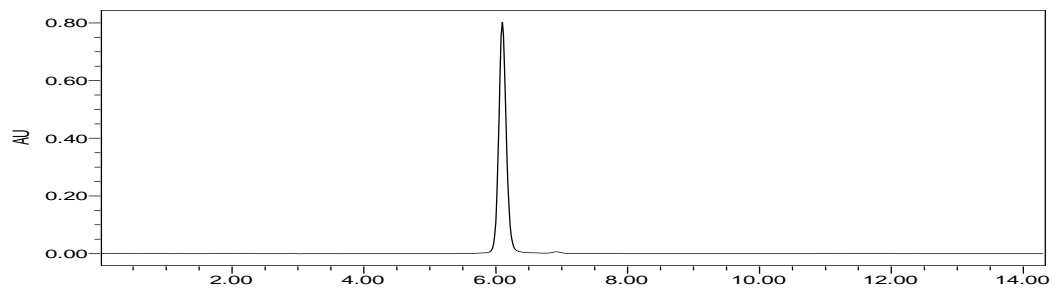

Compound 15

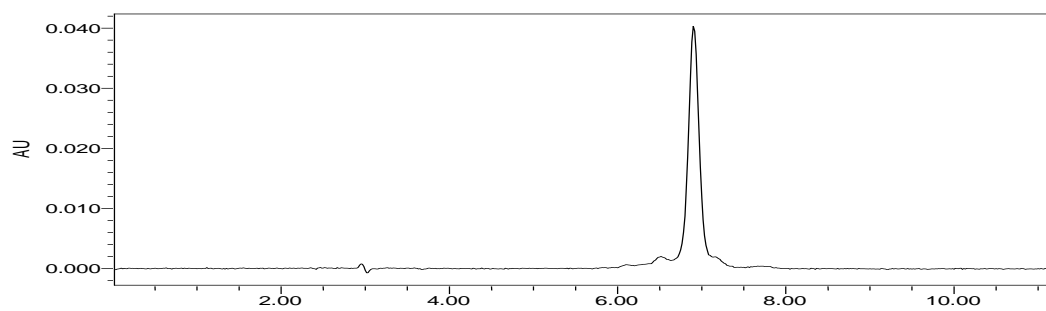

Compound 16

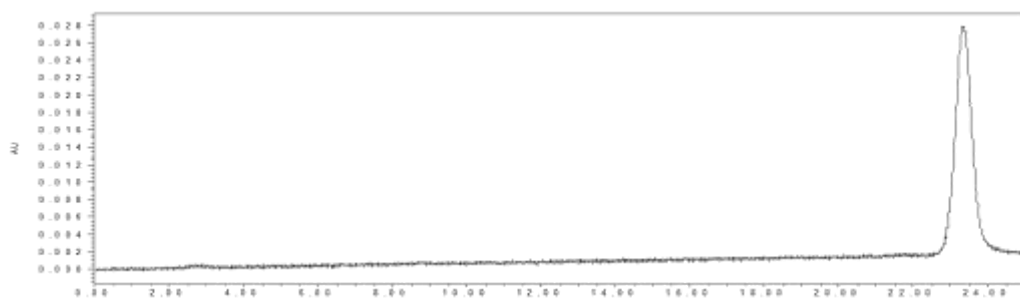

Compound 17

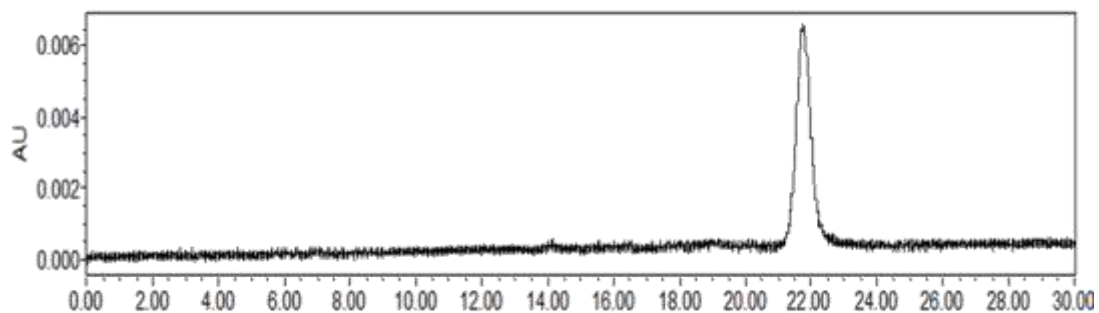

Compound 18

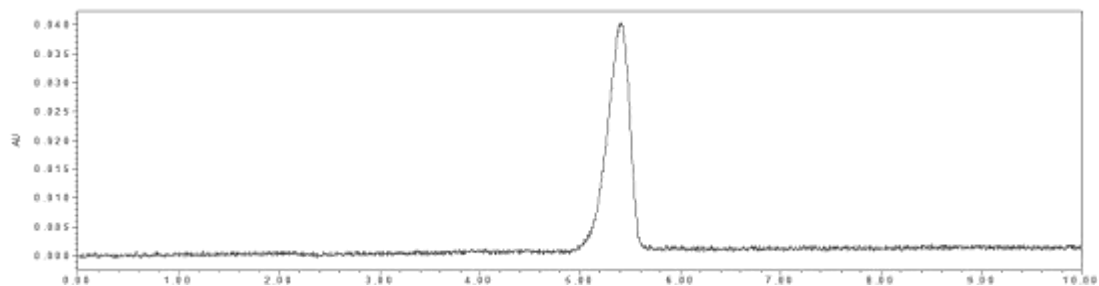

Compound 19

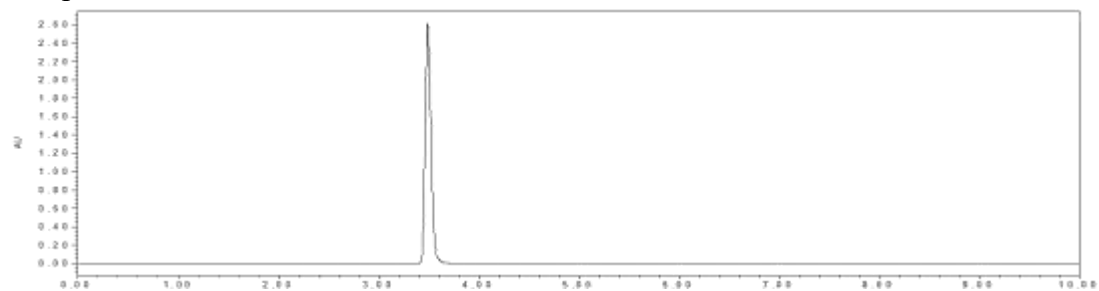

Compound 20

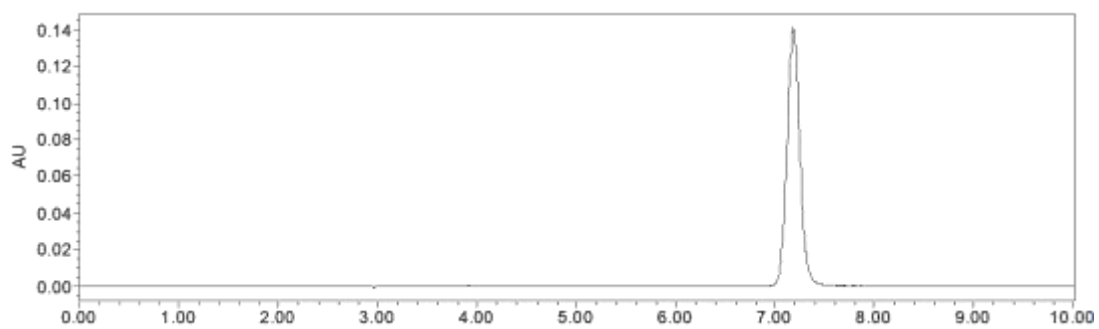

Compound 21

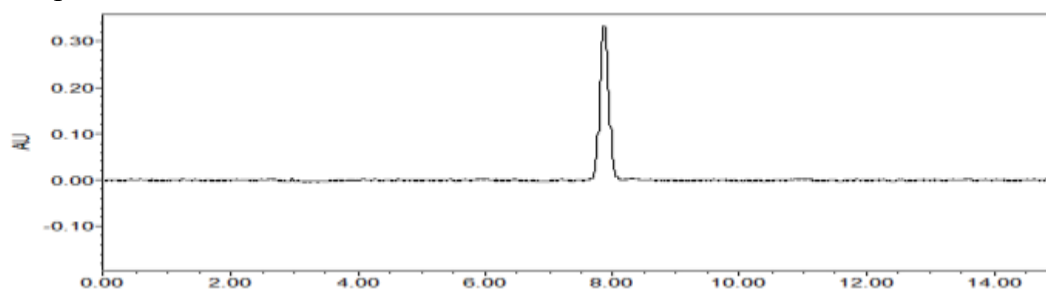

Compound 22

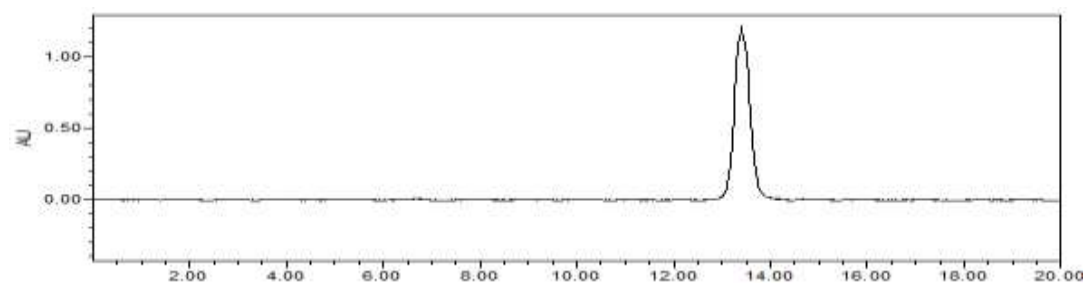

Compound 23

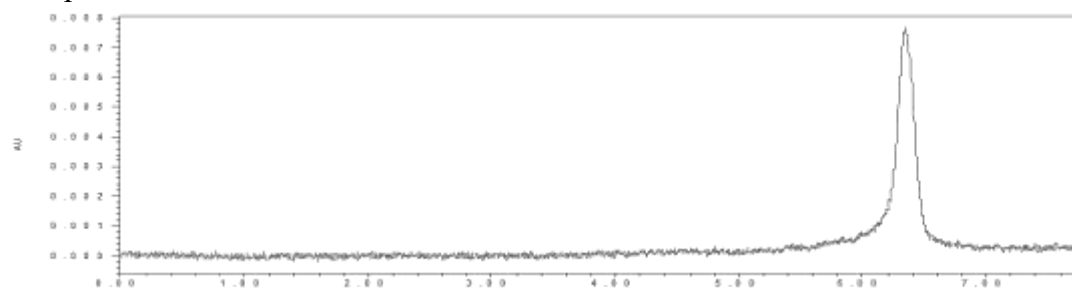

Compound 24

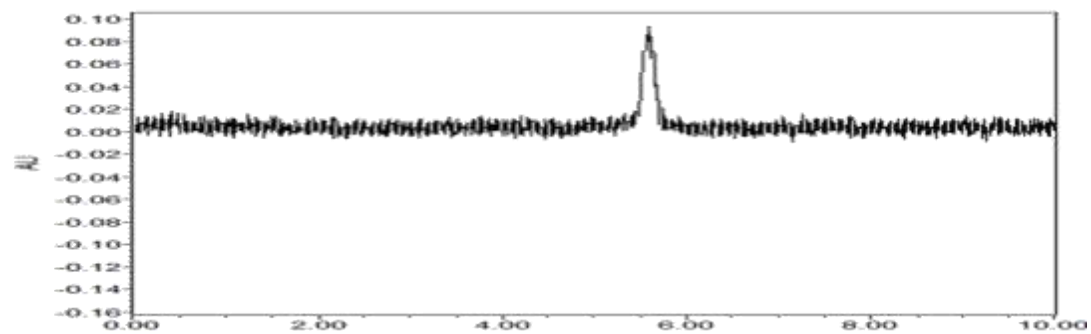

Compound 25

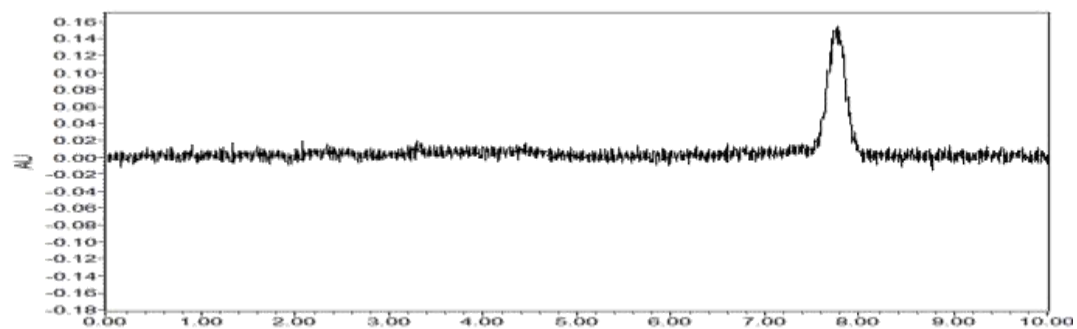

Compound 26

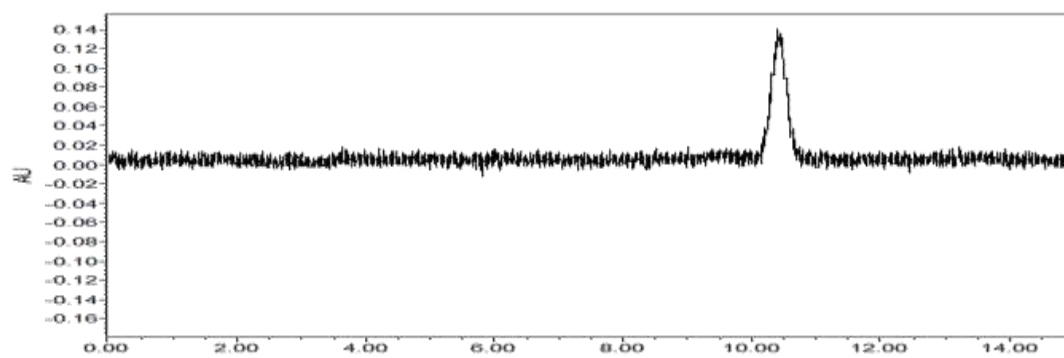

Figure S1. Compounds 1-26 purification verification chromatography

Additive a

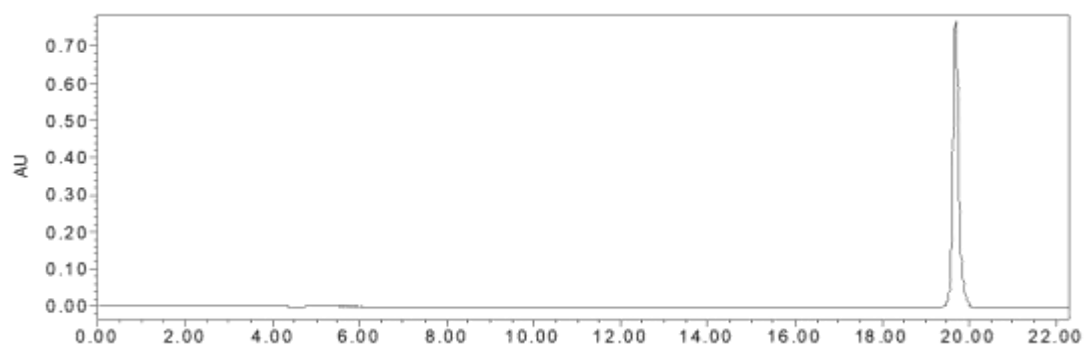

Additive b

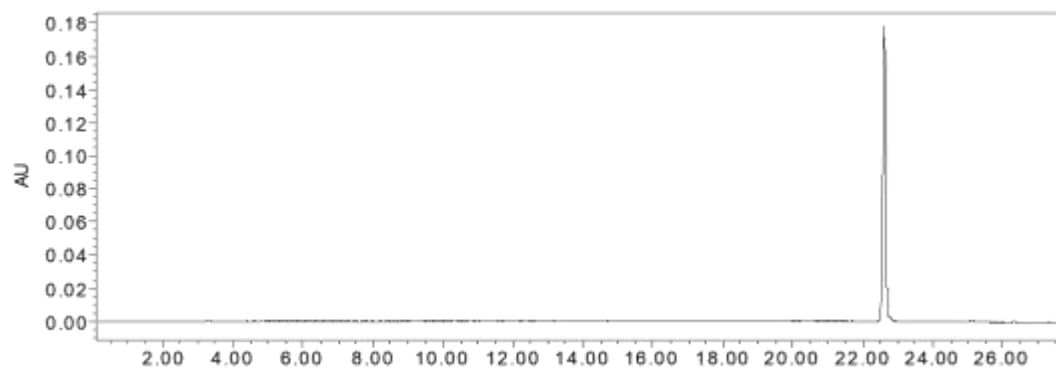

Additive c

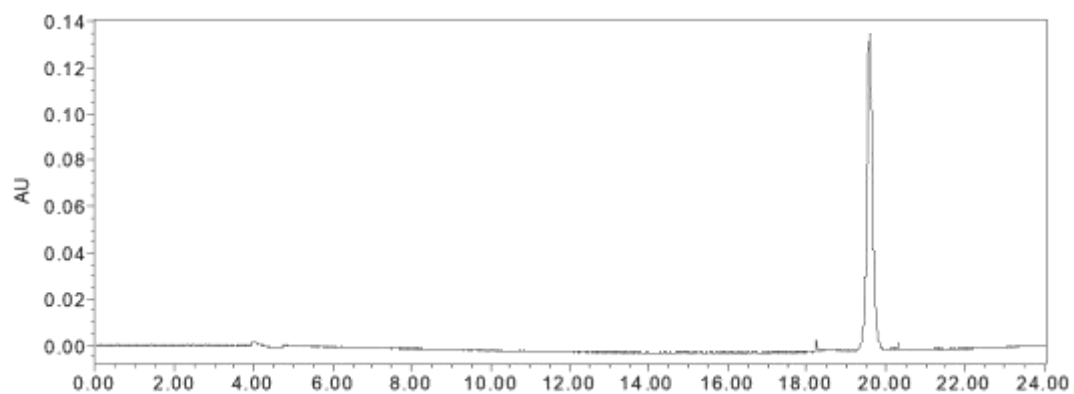

**Figure S2.** HPLC chromatography of three preservatives

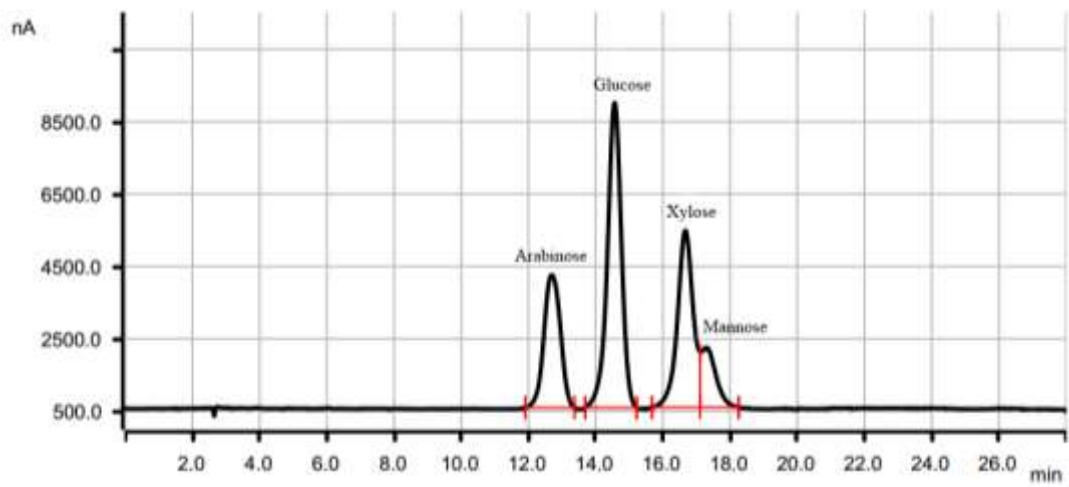

**Figure S3.** Ion chromatogram of carbohydrate
